# Supplementary material for: Facilitation of Reparative Dentin Using a Drug Repositioning Approach With 4-Phenylbutric Acid
Source: Research Square preprint supplement (doi:10.21203/rs.3.rs-119295/v1), 2020-12-07
Supplement: Supplementary file 1 [file bf0dc7c242d16550235b43c7.docx]

**Facilitation of reparative dentin using a drug repositioning approach with 4-Phenylbutric acid**

Eui-Seon Lee1, Yam Prasad Aryal1, Tae-Young Kim1, Ji-Youn Kim2, Hitoshi Yamamoto3, Chang-Hyeon An4, Seo-Young An4, Youngkyun Lee1, Wern-Joo Sohn5, Jae-Kwang Jung6, Jung-Hong Ha7*, Jae-Young Kim1*

1Department of Biochemistry, 4Department of Oral and Maxillofacial Radiology, 6Department of Oral Medicine, 7Department of Conservative Dentistry, School of Dentistry, IHBR, Kyungpook National University, Daegu, Korea

2Department of Dental Hygiene, Gachon University, Incheon, Korea

3Department of Histology and Developmental Biology, Tokyo Dental College, Tokyo, Japan

5Pre-Major of Cosmetics and Pharmaceutics, Daegu Haany University, Gyeongsan, Korea

*Corresponding address:

Jae-Young Kim, 2177 Dalgubeol-daero, Joong-gu, Daegu 41940, Korea

Tel: +82-53-420-4998; E-mail: [jykim91@knu.ac.kr](mailto:jykim91@knu.ac.kr)

ORCID: 0000-0002-6752-5683

Jung-Hong Ha, 2177 Dalgubeol-daero, Joong-gu, Daegu 41940, Korea

Tel: +82-53-600-7624; E-mail: [endoking@knu.ac.kr](mailto:endoking@knu.ac.kr)

ORCID: 0000-0002-0469-4324

**Supplementary Table 1**. Statistical evaluation of immunohistochemical staining against NESTIN, GRP78, HRD1, MPO and TGF-β1.

|  | Group | NESTIN | GRP78 | HRD1 | MPO | TGF-β1 |
| --- | --- | --- | --- | --- | --- | --- |
| **+ 3d** | 0.07% DMSO | **+** | **+** | **+++** | **++** | **+** |
| 100 µM 4PBA | **+++** | **-** | **+++** | **+** | **++** |
| **+ 5d** | 0.07% DMSO | **++** | **+++** | **+** | **+++** | **-** |
| 100 µM 4PBA | **+++** | **++** | **++** | **+** | **-** |

-:none, +: exist, ++: strong, +++: strongest
